# Supplementary material for: Circadian clock gene Clock-Bmal1 regulates cellular senescence in Chronic obstructive pulmonary disease
Source: Springer Nature journal article supplement (doi:10.1186/s12890-022-02237-y), 2022-11-22
Supplement: MOESM3 [file 12890_2022_2237_MOESM3_ESM.pdf]

## Full blots images for the main figure 2

**A**

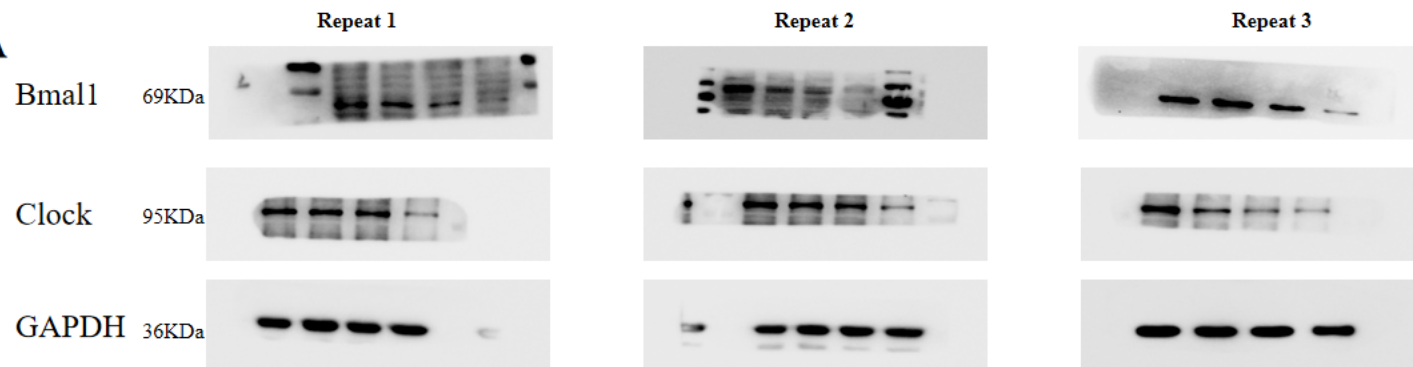

**B**

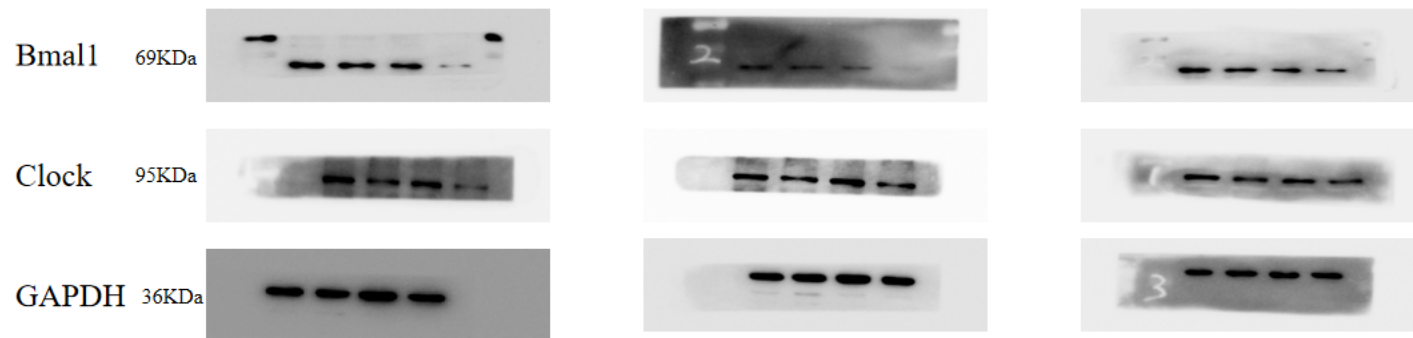

**Supp. Figure 1. CSE decreased the expression of Bmal1 and Clock in Beas-2B cells.** A. CSE decreased the protein levels of Bmal1 and Clock in Beas-2B cells at concentrations of CSE (0.25–1%) for 24h. B. 0.5% CSE decreased the protein levels of Bmal1 and Clock in Beas-2B cells at times of CSE treatment (24–72 h).
